# Supplementary material for: Simultaneous Quantitation of Lipid Biomarkers for Inflammatory Bowel Disease Using LC–MS/MS
Source: PubMed Central journal article supplement (PMC7918109; doi:10.3390/metabo11020106), 2021-02-12
Supplement: metabolites-11-00106-s001.pdf [file metabolites-11-00106-s001.pdf]

## Supplementary Materials

# Simultaneous quantitation of lipid biomarkers for inflammatory bowel disease using LC–MS/MS

**Yashpal S. Chhonker**<sup>1</sup>, **Shrey Kanvinde**<sup>2</sup>, **Rizwan Ahmad**<sup>3</sup>, **Amar B. Singh**<sup>3,4,5</sup>, **David Oupický**<sup>2,4</sup>, and **Daryl J. Murry**<sup>1,4,\*</sup>

<sup>1</sup> Clinical Pharmacology Laboratory, Department of Pharmacy Practice and Science, College of Pharmacy, University of Nebraska Medical Center, Omaha, NE 68198, USA, y.chhonker@unmc.edu ; dj.murry@unmc.edu

<sup>2</sup> Center for Drug Delivery and Nanomedicine, Department of Pharmaceutical Sciences, College of Pharmacy, University of Nebraska Medical Center, Omaha, NE 68198, USA, shreykanvinde@gmail.com (S.K.); david.oupicky@unmc.edu (D.O.)

<sup>3</sup> Department of Biochemistry and Molecular Biology, University of Nebraska Medical Center, Omaha, NE 68198, USA, rizwan.ahmad@unmc.edu

<sup>4</sup> Fred and Pamela Buffett Cancer Center, University of Nebraska Medical Center, Omaha, NE 68198, USA, amar.singh@unmc.edu

<sup>5</sup> VA Nebraska-Western Iowa Health Care System, Omaha, NE 68105, USA

\* Correspondence: dj.murry@unmc.edu; Tel.: +402-559-3790 or +402-559-2430

Table S1. Summarizes the comparison of this method with previously reported LC-MS/MS methods related to eicosanoid quantification in in rat/mouse plasma and tissues.

| Method     | No. of Eicosanoids quantified | Matrix                         | Matrix Volume                     | LOQ Ranges            | Analysis run time (min) | Sample pretreatment | Reference      |
|------------|-------------------------------|--------------------------------|-----------------------------------|-----------------------|-------------------------|---------------------|----------------|
| LC-MS/MS   | 23                            | Rat kidney tissue              | 100 mg                            | 5.5 to 223.8pg        | 60                      | SPE                 | [1]            |
| LC-MS/MS   | 137                           | Mouse tissue                   | Whole organ tissues               | 0.5 to 50 pg          | 20.1                    | SPE                 | [2]            |
| LC-MS/MS   | 40                            | Rat tissue                     |                                   | 0.01 to 0.1 nmol/g    | 30                      | SPE                 | [3]            |
| LC-MS-MS   | 11                            | Rat brain tissue               | Whole brain                       | 0.10 ng/mL            | 12                      | SPE                 | [4]            |
| LC-MS/MS   | 24                            | Mouse colon tissue             | Whole colon                       | LOQ: 0.98 to 31 ng/mL | 8.5                     | SPE                 | [5]            |
| UPLC-MS/MS | 48                            | Mouse serum and tissue samples | 150 $\mu$ L serum and 5 mg tissue | 0.3 to 4.0 nM         | 8                       | SPE                 | [6]            |
| LC-MS/MS   | 19                            | Rat brain tissue               | 20-40 mg                          | 2.0 pg to 20 ng       | 35                      | SPE                 | [7]            |
| UPLC-MS/MS | 18                            | Rat brain tissue               | 1.5-2 gm                          | NA                    | 27                      | SPE                 | [8]            |
| UPLC-MS/MS | 66                            | Mouse colon tissue             | 250uL homogenate (~50mg)          | 0.01 to 1.0 ng/mL     | 25                      | SPE                 | Current method |

Table S2. Mean extraction recoveries and matrix effect of the ISs in surrogate matrix and colon homogenate.

| Bio-Matrix             | Analytes       | Estimates (Mean ± SD, n=3)   |            |                            |            |
|------------------------|----------------|------------------------------|------------|----------------------------|------------|
|                        |                | Mean Extraction Recovery (%) |            | Absolute Matrix effect (%) |            |
|                        |                | LQC                          | HQC        | LQC                        | HQC        |
| Surrogate Matrix       | TXB2-d4        | 87.8 ± 1.3                   | 86.4 ± 1.3 | 99.1 ± 6.2                 | 85.2 ± 3   |
|                        | PGE2-d4        | 90.4 ± 3.2                   | 87.3 ± 3.3 | 102.3 ± 8.2                | 102 ± 2    |
|                        | AA-d8          | 60.9 ± 5.8                   | 68.5 ± 1.5 | 88.7 ± 2.5                 | 89.5 ± 5.1 |
|                        | 15 -HETE-d8    | 49.9 ± 0.7                   | 51.8 ± 2.5 | 102.1 ± 9.1                | 86.9 ± 4.2 |
|                        | LTB4-d4        | 63.1 ± 2.6                   | 66.1 ± 1.8 | 106.2 ± 9.4                | 90.7 ± 8.4 |
|                        | Resolvin D1-d5 | 85.9 ± 1.4                   | 78.3 ± 2.4 | 100.5 ± 2.5                | 88.9 ± 4.6 |
| Mouse Colon homogenate | TXB2-d4        | 85.8 ± 1.4                   | 83.1 ± 3   | 97.5 ± 5.7                 | 84.2 ± 3   |
|                        | PGE2-d4        | 84.7 ± 3                     | 86.7 ± 4.9 | 93.5 ± 3.8                 | 102 ± 2    |
|                        | AA-d8          | 66.1 ± 4.5                   | 62.9 ± 5.2 | 86.2 ± 3.3                 | 89.5 ± 5.1 |
|                        | 15 -HETE-d8    | 48 ± 5.5                     | 53.8 ± 8.2 | 95 ± 9.8                   | 86.9 ± 4.2 |
|                        | LTB4-d4        | 61.2 ± 1.7                   | 54.9 ± 3.6 | 91.2 ± 12.6                | 90.7 ± 8.4 |
|                        | Resolvin D1-d5 | 80.3 ± 2.2                   | 71.2 ± 5.3 | 86 ± 1.5                   | 88.9 ± 4.6 |

Table S3. Eicosanoids stability in plasma under various storage conditions. (Instability was defined as a 20% or more decrease in peak under different storage condition compare to freshly prepared QCs.)

| Analytes ID | Analytes                | Auto sampler at 4 °C for 24hr | Benchtop at 25 °C for 1 hr | Benchtop at 25 °C for 4hr | Freeze-thaw at -80 °C for three cycle | Long term at -80 °C for 30 days |
|-------------|-------------------------|-------------------------------|----------------------------|---------------------------|---------------------------------------|---------------------------------|
| 1           | PGJ2                    | 89.4                          | 105.8                      | 108.4                     | 99.3                                  | 87.0                            |
| 3           | 20-OH-PGE2              | 89.3                          | 98.7                       | 90.4                      | 89.2                                  | 93.9                            |
| 4           | PGB2                    | 90.7                          | 93.9                       | 92.9                      | 85.0                                  | 87.4                            |
| 6           | PGD2                    | 92.3                          | 81.1                       | 89.6                      | 81.3                                  | 83.3                            |
| 7           | PGE2                    | 98.5                          | 98.7                       | 93.1                      | 100.1                                 | 102.3                           |
| 8           | AA                      | 59.2                          | 109.2                      | 88.0                      | 110.0                                 | 91.1                            |
| 9           | 15-HETE                 | 94.2                          | 108.8                      | 108.0                     | 105.8                                 | 100.8                           |
| 10          | 12-HETE                 | 91.8                          | 101.5                      | 110.3                     | 94.9                                  | 95.3                            |
| 11          | 11-HETE                 | 92.1                          | 107.7                      | 107.9                     | 104.3                                 | 100.1                           |
| 12          | 8-HETE                  | 93.6                          | 101.6                      | 123.4                     | 96.0                                  | 96.1                            |
| 13          | 5-HETE                  | 95.3                          | 104.2                      | 107.3                     | 101.9                                 | 97.5                            |
| 14          | LTE4                    | 85.0                          | 106.8                      | 109.0                     | 101.0                                 | 108.4                           |
| 15          | LTD4                    | 102.2                         | 54.7                       | 5.5                       | 35.0                                  | 78.9                            |
| 16          | LTC4                    | 86.1                          | 7.9                        | 1.3                       | 1.6                                   | 14.4                            |
| 17          | LTB4                    | 89.3                          | 89.5                       | 84.5                      | 79.6                                  | 81.1                            |
| 18          | 13,14-DiOH-15-Keto-PGE2 | 87.0                          | 81.4                       | 46.8                      | 66.2                                  | 78.0                            |

|    |                           |       |       |       |       |       |
|----|---------------------------|-------|-------|-------|-------|-------|
| 19 | 11-B-PGF2                 | 85.7  | 98.6  | 96.8  | 91.3  | 88.9  |
| 20 | 8-iso-PGF2                | 93.4  | 98.3  | 94.6  | 92.1  | 93.5  |
| 21 | PGF2                      | 104.9 | 103.5 | 102.0 | 104.9 | 107.5 |
| 22 | 15-Keto-PGE2              | 86.5  | 80.8  | 49.5  | 71.6  | 81.4  |
| 23 | 6-Keto-PGF1               | 94.3  | 98.6  | 97.1  | 97.8  | 98.2  |
| 24 | TXB2                      | 91.3  | 102.0 | 92.9  | 90.9  | 94.2  |
| 29 | 13,14-DiOH-PGF2           | 84.8  | 92.3  | 88.9  | 86.4  | 86.7  |
| 30 | PGF1                      | 94.4  | 99.6  | 94.7  | 96.1  | 96.1  |
| 31 | 13,14-DiOH-15-Keto-PGF2   | 100.1 | 95.5  | 95.5  | 95.1  | 96.4  |
| 32 | 13,14-DiOH-15-Keto-PGE1   | 97.0  | 89.6  | 79.5  | 89.0  | 94.4  |
| 33 | PGD1                      | 92.5  | 82.7  | 49.3  | 84.6  | 85.8  |
| 34 | 13,14-DiOH-PGE1           | 84.7  | 82.3  | 67.7  | 81.0  | 78.9  |
| 35 | TXB3                      | 102.6 | 100.1 | 93.4  | 97.1  | 101.2 |
| 36 | 15-deoxy-delta 12,14 PGJ2 | 95.8  | 91.9  | 78.7  | 86.6  | 92.0  |
| 37 | PGE1                      | 98.4  | 96.8  | 93.3  | 97.8  | 97.1  |
| 38 | PGE3                      | 85.4  | 91.0  | 75.9  | 71.0  | 69.5  |
| 39 | PGD3                      | 103.0 | 86.1  | 42.6  | 92.6  | 116.7 |
| 40 | PGF3                      | 101.8 | 108.0 | 101.7 | 103.3 | 99.3  |
| 41 | 14,15-LTC4                | 82.8  | 11.6  | 0.8   | 2.6   | 23.6  |
| 42 | Tetranor-PGEM             | 93.9  | 95.4  | 72.7  | 71.4  | 91.1  |

|    |                      |       |       |       |       |       |
|----|----------------------|-------|-------|-------|-------|-------|
| 43 | Tetranor-PGFM        | 93.2  | 93.3  | 89.0  | 88.9  | 89.5  |
| 44 | 11-De TXB3           | 85.7  | 45.4  | 4.3   | 21.2  | 47.5  |
| 45 | 2,3 Dinor 8-iso PGF2 | 94.2  | 98.5  | 98.5  | 97.3  | 98.4  |
| 53 | Docosahexaenoic Acid | 98.3  | 107.8 | 88.5  | 108.1 | 91.9  |
| 54 | 9(10)-DiHOME         | 92.3  | 88.8  | 88.1  | 81.8  | 83.7  |
| 55 | 12(13)-DiHOME        | 95.1  | 91.3  | 86.8  | 83.7  | 84.5  |
| 56 | 4-HDHA               | 91.7  | 105.9 | 125.9 | 101.1 | 94.4  |
| 57 | 7-HDHA               | 93.9  | 95.6  | 101.2 | 84.2  | 92.5  |
| 58 | 8-HDHA               | 90.5  | 96.6  | 111.8 | 86.6  | 90.8  |
| 59 | 10-HDHA              | 92.9  | 97.6  | 101.7 | 90.5  | 94.6  |
| 60 | 11-HDHA              | 88.8  | 93.7  | 101.3 | 85.0  | 90.9  |
| 61 | 11-HEDE              | 100.9 | 96.0  | 98.9  | 86.5  | 93.8  |
| 62 | 15-HEDE              | 100.6 | 97.3  | 101.3 | 91.8  | 98.0  |
| 63 | 5-HEPE               | 93.7  | 95.9  | 115.8 | 86.1  | 94.0  |
| 64 | 8-HEPE               | 92.3  | 91.6  | 81.2  | 81.0  | 88.6  |
| 65 | 11-HEPE              | 99.4  | 92.2  | 96.2  | 88.2  | 92.4  |
| 66 | 12-HEPE              | 98.2  | 88.9  | 95.8  | 83.8  | 85.2  |
| 67 | 15-HEPE              | 94.0  | 92.4  | 100.5 | 92.0  | 91.7  |
| 68 | 9(S)-HOTrE           | 96.5  | 86.4  | 94.4  | 81.1  | 82.2  |
| 69 | 13(S)-HOTrE          | 92.0  | 98.0  | 106.3 | 98.0  | 100.2 |

|    |                      |      |       |      |       |       |
|----|----------------------|------|-------|------|-------|-------|
| 70 | 5-OxoETE             | 91.7 | 93.7  | 95.0 | 86.8  | 90.6  |
| 71 | 12-OxoETE            | 75.5 | 61.2  | 25.1 | 47.6  | 57.1  |
| 72 | 15-OxoETE or 15-KETE | 95.9 | 100.4 | 99.5 | 90.6  | 97.0  |
| 73 | 9-OxoODE or 9-KEDE   | 92.8 | 95.6  | 99.2 | 85.7  | 89.9  |
| 74 | 15-OxoEDE or 15-KEDE | 91.2 | 93.4  | 92.0 | 86.4  | 90.3  |
| 76 | Tetranor-PGDM        | 92.8 | 93.9  | 75.9 | 77.7  | 88.6  |
| 77 | Tetranor-PGJM        | 93.5 | 95.3  | 89.4 | 90.5  | 93.9  |
| 78 | Resolvin D1          | 95.7 | 92.2  | 86.2 | 88.2  | 92.6  |
| 79 | Resolvin D2          | 84.8 | 93.8  | 91.8 | 92.0  | 89.6  |
| 80 | Resolvin D3          | 98.1 | 98.7  | 98.4 | 100.9 | 100.1 |
| 25 | TXB2-d4              | 97.1 | 98.9  | 90.3 | 93.6  | 96.0  |
| 26 | PGE2-d4              | 95.8 | 91.9  | 88.7 | 86.6  | 92.0  |
| 27 | AA-d8                | 71.2 | 109.5 | 81.3 | 99.3  | 83.2  |
| 46 | 15 -HETE-d8          | 94.8 | 101.4 | 92.8 | 96.1  | 98.0  |
| 47 | LTB4-d4              | 86.8 | 87.3  | 80.1 | 85.7  | 87.7  |
| 81 | Resolvin D1-d5       | 93.6 | 94.2  | 86.5 | 88.9  | 90.9  |

Table S4. Eicosanoids concentration (ng/g) in colon of healthy as well as mice having *C. rodentium* induced inflammation (mean  $\pm$  SD, n=5).

| Analyte ID | Analytes                | Healthy Control (HC) colon Mean Conc (ng/g) | SD       | IBD colon Mean conc ng/g) | SD       |
|------------|-------------------------|---------------------------------------------|----------|---------------------------|----------|
| 1          | PGJ2                    | 232.95                                      | 104.07   | 209.35                    | 97.40    |
| 3          | 20-OH-PGE2              | 5.46                                        | 0.54     | 10.54                     | 4.57     |
| 4          | PGB2                    | 28.00                                       | 16.11    | 41.93                     | 28.92    |
| 6          | PGD2                    | 1169.16                                     | 279.36   | 1591.71                   | 736.29   |
| 7          | PGE2                    | 5403.96                                     | 126.38   | 7159.45                   | 2659.66  |
| 8          | AA                      | 86405.26                                    | 40368.75 | 89152.24                  | 25309.67 |
| 9          | 15-HETE                 | 1505.19                                     | 894.43   | 1910.82                   | 654.19   |
| 10         | 12-HETE                 | 3567.75                                     | 1974.72  | 4426.39                   | 997.65   |
| 11         | 11-HETE                 | 1820.55                                     | 518.63   | 3020.57                   | 984.28   |
| 12         | 8-HETE                  | 87.05                                       | 24.18    | 73.83                     | 16.99    |
| 13         | 5-HETE                  | 472.65                                      | 200.51   | 425.71                    | 136.48   |
| 14         | LTE4                    | 14.29                                       | 7.83     | 26.44                     | 8.20     |
| 15         | LTD4                    | 2.13                                        | 2.01     | 1.97                      | 1.26     |
| 16         | LTC4                    | 82.41                                       | 32.92    | 95.17                     | 17.84    |
| 17         | LTB4                    | 16.13                                       | 7.58     | 20.42                     | 3.34     |
| 18         | 13,14-DiOH-15-Keto-PGE2 | 304.19                                      | 78.50    | 623.46                    | 163.15   |



|    |                           |          |         |          |         |
|----|---------------------------|----------|---------|----------|---------|
| 19 | 11-B-PGF2-2               | 153.09   | 34.06   | 343.30   | 128.43  |
| 20 | 8-iso-PGF2                | 93.03    | 7.28    | 139.43   | 47.09   |
| 21 | PGF2                      | 1573.86  | 147.54  | 2656.65  | 768.61  |
| 22 | 15-Keto-PGE2              | 1500.58  | 259.15  | 3394.34  | 1282.99 |
| 23 | 6-Keto-PGF1               | 11156.37 | 1458.98 | 17290.82 | 4123.40 |
| 24 | TXB2                      | 1709.22  | 129.25  | 2320.30  | 437.64  |
| 29 | 13,14-DiOH-PGF2           | 8.65     | 1.11    | 18.10    | 3.89    |
| 30 | PGF1                      | 448.30   | 63.46   | 604.04   | 164.68  |
| 31 | 13,14-DiOH-15-Keto-PGF2   | 133.54   | 59.29   | 327.53   | 60.56   |
| 32 | 13,14-DiOH-15-Keto-PGE1   | 151.70   | 50.06   | 242.49   | 28.08   |
| 33 | PGD1                      | 172.56   | 50.46   | 189.23   | 44.09   |
| 34 | 13,14-DiOH-PGE1           | 12.85    | 3.75    | 38.39    | 10.98   |
| 35 | TXB3                      | 56.27    | 6.55    | 73.85    | 14.93   |
| 36 | 15-deoxy-delta 12,14 PGJ2 | 474.16   | 144.32  | 514.20   | 243.44  |
| 37 | PGE1                      | 1651.08  | 115.04  | 1632.90  | 555.48  |
| 38 | PGE3                      | 75.04    | 9.52    | 100.61   | 41.26   |
| 39 | PGD3                      | 10.46    | 4.81    | 12.85    | 4.57    |
| 40 | PGF3                      | 28.99    | 3.08    | 55.00    | 21.01   |
| 41 | 14,15-LTC4                | 8.13     | 3.04    | 7.76     | 2.30    |
| 42 | Tetranor-PGEM             | BLQ      |         | BLQ      |         |

|    |                      |          |         |          |         |
|----|----------------------|----------|---------|----------|---------|
| 43 | Tetranor-PGFM        | BLQ      |         | BLQ      |         |
| 44 | 11-De TXB3           | 8.82     | 8.01    | 4.74     | 1.57    |
| 45 | 2,3 Dinor 8-iso PGF2 | 0.26     | 0.08    | 1.01     | 0.49    |
| 53 | Docosahexaenoic Acid | 24098.92 | 4739.54 | 29856.62 | 9036.01 |
| 54 | (±)9(10)-DiHOME      | 702.59   | 195.61  | 783.14   | 222.86  |
| 55 | (±)12(13)-DiHOME     | 757.36   | 243.15  | 839.03   | 227.31  |
| 56 | (±)4-HDHA            | 163.08   | 78.86   | 96.55    | 42.28   |
| 57 | (±)7-HDHA            | 15.46    | 2.09    | 9.48     | 2.56    |
| 58 | (±)8-HDHA            | 51.16    | 10.31   | 27.51    | 6.66    |
| 59 | (±)10-HDHA           | 27.17    | 6.35    | 18.63    | 3.91    |
| 60 | (±)11-HDHA           | 31.18    | 7.21    | 19.01    | 4.65    |
| 61 | (±)11-HEDE           | 355.45   | 163.41  | 394.61   | 115.52  |
| 62 | (±)15-HEDE           | 225.39   | 42.92   | 137.29   | 36.45   |
| 63 | (±)5-HEPE            | 15.74    | 5.36    | 11.91    | 2.37    |
| 64 | (±)8-HEPE            | 44.91    | 45.50   | 33.68    | 15.17   |
| 65 | (±)11-HEPE           | 93.53    | 42.65   | 160.43   | 47.15   |
| 66 | (±)12-HEPE           | 418.97   | 196.19  | 518.99   | 161.69  |
| 67 | (±)15-HEPE           | 32.46    | 27.97   | 93.81    | 28.16   |
| 68 | 9(S)-HOTrE           | 299.92   | 112.12  | 219.79   | 60.23   |
| 69 | 13(S)-HOTrE          | 268.19   | 129.65  | 445.28   | 100.18  |

|    |                      |         |         |         |        |
|----|----------------------|---------|---------|---------|--------|
| 70 | 5-OxoETE             | 784.73  | 880.14  | 270.66  | 126.57 |
| 71 | 12-OxoETE            | 511.97  | 515.20  | 722.71  | 245.14 |
| 72 | 15-OxoETE or 15-KETE | 511.97  | 515.20  | 722.71  | 245.14 |
| 73 | 9-OxoODE or 9-KEDE   | 5175.68 | 2274.35 | 2952.75 | 697.94 |
| 74 | 15-OxoEDE or 15-KEDE | 58.84   | 34.33   | 31.73   | 5.60   |
| 76 | tetranor-PGDM        | BLQ     |         | BLQ     |        |
| 77 | tetranor-PGJM        | BLQ     |         | BLQ     |        |
| 78 | Resolvin D1          | 1.96    | 1.71    | 2.92    | 1.06   |
| 79 | Resolvin D2          | 1.33    | 0.35    | 1.45    | 0.72   |
| 80 | Resolvin D3          | 0.40    | 0.12    | 0.42    | 0.28   |

Table S5. List of all compounds their chemical name, abbreviation, and CAS No.

| Analytes ID | Chemical Name                          | abbreviation            | CAS No.     |
|-------------|----------------------------------------|-------------------------|-------------|
| 1           | Prostaglandin J2                       | PGJ2                    | 60203-57-8  |
| 3           | 20-hydroxy prostaglandin E2            | 20-OH-PGE2              | 57930-95-7  |
| 4           | Prostaglandin B2                       | PGB2                    | 13367-85-6  |
| 6           | Prostaglandin D2                       | PGD2                    | 41598-07-6  |
| 7           | Prostaglandin E2                       | PGE2                    | 363-24-6    |
| 8           | Arachidonic acid                       | AA                      | 506-32-1    |
| 9           | 15-hydroxyeicosatetraenoic acid        | 15-HETE                 | 71030-36-9  |
| 10          | 12-hydroxyeicosatetraenoic acid        | 12-HETE                 | 71030-37-0  |
| 11          | 11-hydroxyeicosatetraenoic acid        | 11-HETE                 | 73804-65-6  |
| 12          | 8-hydroxyeicosatetraenoic acid         | 8-HETE                  | 79495-84-4  |
| 13          | 5-hydroxyeicosatetraenoic acid         | 5-HETE                  | 73307-52-5  |
| 14          | Leukotriene E4                         | LTE4                    | 75715-89-8  |
| 15          | Leukotriene D4                         | LTD4                    | 73836-78-9  |
| 16          | Leukotriene C4                         | LTC4                    | 72025-60-6  |
| 17          | Leukotriene B4                         | LTB4                    | 71160-24-2  |
| 18          | 13,14-dihydro-15-keto-prostaglandin E2 | 13,14-DiOH-15-Keto-PGE2 | 363-23-5    |
| 19          | 11-Beta prostaglandin F2 $\alpha$      | 11-B-PGF2               | 38432-87-0  |
| 20          | 8-iso prostaglandin F2 $\alpha$        | 8-iso-PGF2              | 177020-26-7 |

|    |                                                 |                           |            |
|----|-------------------------------------------------|---------------------------|------------|
| 21 | Prostaglandin F2 $\alpha$                       | PGF2                      | 4510-16-1  |
| 22 | 15-keto-prostaglandin E2                        | 15-Keto-PGE2              | 26441-05-4 |
| 23 | 6-keto-prostaglandin F1 $\alpha$                | 6-Keto-PGF1               | 58962-34-8 |
| 24 | Thromboxane B2                                  | TXB2                      | 54397-85-2 |
| 29 | 13,14-dihydro-prostaglandin F2 $\alpha$         | 13,14-DiOH-PGF2           | 27376-74-5 |
| 30 | Prostaglandin F1 $\alpha$                       | PGF1                      | 10164-73-5 |
| 31 | 13,14-dihydro-15-keto-prostaglandin F2 $\alpha$ | 13,14-DiOH-15-Keto-PGF2   | 27376-76-7 |
| 32 | 13,14-dihydro-15-keto-prostaglandin E1          | 13,14-DiOH-15-Keto-PGE1   | 5094-14-4  |
| 33 | Prostaglandin D1                                | PGD1                      | 17968-82-0 |
| 34 | 13,14-dihydro-prostaglandin E1                  | 13,14-DiOH-PGE1           | 19313-28-1 |
| 35 | Thromboxane B3                                  | TXB3                      | 71953-80-5 |
| 36 | 15- deoxy-delta 12,14 Prostaglandin J2          | 15-deoxy-delta 12,14 PGJ2 | 87893-55-8 |
| 37 | Prostaglandin E1                                | PGE1                      | 745-65-3   |
| 38 | Prostaglandin E3                                | PGE3                      | 802-31-3   |
| 39 | Prostaglandin D3                                | PGD3                      | 71902-47-1 |
| 40 | Prostaglandin F3 $\alpha$                       | PGF3                      | 802-31-3   |
| 41 | 13,14-leukotriene C4                            | 14,15-LTC4                | 75290-60-7 |
| 42 | Tetranor-prostaglandin E metabolite             | Tetranor-PGEM             | 24769-56-0 |
| 43 | Tetranor-prostaglandin F metabolite             | Tetranor-PGFM             | 23109-94-6 |
| 44 | 11-dehydro-thromboxane B3                       | 11-De TXB3                | 67910-12-7 |

|    |                                                              |                      |             |
|----|--------------------------------------------------------------|----------------------|-------------|
| 45 | 2,3-dinor-8-iso prostaglandin F2 $\alpha$                    | 2,3 Dinor 8-iso PGF2 | 221664-05-7 |
| 53 | Docosahexaenoic Acid                                         | Docosahexaenoic Acid | 6217-54-5   |
| 54 | ( $\pm$ )-9,10-dihydroxy-12Z-octadecenoic acid               | 9(10)-DiHOME         | 263399-34-4 |
| 55 | ( $\pm$ )-12,13-dihydroxy-9Z-octadecenoic acid               | 12(13)-DiHOME        | 263399-35-5 |
| 56 | 4-hydroxy Docosahexaenoic Acid                               | 4-HDHA               | 90906-40-4  |
| 57 | 7-hydroxy Docosahexaenoic Acid                               | 7-HDHA               | 90780-55-5  |
| 58 | 8-hydroxy Docosahexaenoic Acid                               | 8-HDHA               | 90780-54-4  |
| 59 | 10-hydroxy Docosahexaenoic Acid                              | 10-HDHA              | 90780-50-0  |
| 60 | 11-hydroxy Docosahexaenoic Acid                              | 11-HDHA              | 87018-59-5  |
| 61 | ( $\pm$ )-11-hydroxy-12E,14Z-eicosadienoic acid              | 11-HEDE              | 5598-37-8   |
| 62 | ( $\pm$ )-15-hydroxy-12E,14Z-eicosadienoic acid              | 15-HEDE              | 77159-57-0  |
| 63 | ( $\pm$ )-5-hydroxy-6E,8Z,11Z,14Z,17Z-eicosapentaenoic acid  | 5-HEPE               | 83952-40-3  |
| 64 | ( $\pm$ )-8-hydroxy-6E,8Z,11Z,14Z,17Z-eicosapentaenoic acid  | 8-HEPE               | 99217-77-3  |
| 65 | ( $\pm$ )-11-hydroxy-6E,8Z,11Z,14Z,17Z-eicosapentaenoic acid | 11-HEPE              | 99217-78-4  |
| 66 | ( $\pm$ )-12-hydroxy-6E,8Z,11Z,14Z,17Z-eicosapentaenoic acid | 12-HEPE              | 81187-21-5  |
| 67 | ( $\pm$ )-15-hydroxy-6E,8Z,11Z,14Z,17Z-eicosapentaenoic acid | 15-HEPE              | 88852-33-9  |
| 68 | 9S-hydroxy-10E,12Z,15Z-octadecatrienoic acid                 | 9(S)-HOTrE           | 89886-42-0  |
| 69 | 13S-hydroxy-10E,12Z,15Z-octadecatrienoic acid                | 13(S)-HOTrE          | 87984-82-5  |
| 70 | 5-oxo-6E,8Z,11Z,14Z-eicosatetraenoic acid                    | 5-OxoETE             | 106154-18-1 |
| 71 | 12-oxo-6E,8Z,11Z,14Z-eicosatetraenoic acid                   | 12-OxoETE            | 108437-64-5 |

|    |                                                                                       |                      |              |
|----|---------------------------------------------------------------------------------------|----------------------|--------------|
| 72 | 15-oxo-5Z,8Z,11Z,13E-eicosatetraenoic acid                                            | 15-OxoETE or 15-KETE | 81416-72-0   |
| 73 | 9-oxo-10E,12Z-octadecadienoic acid                                                    | 9-OxoODE or 9-KEDE   | 54232-59-6   |
| 74 | 15-oxo-11Z,13E-eicosadienoic acid                                                     | 15-OxoEDE or 15-KEDE | 105835-44-7  |
| 76 | 9 $\alpha$ -hydroxy-11,15-dioxo-13,14-dihydro-2,3,4,5-tetranorprostan-1,20-dioic acid | Tetranor-PGDM        | 70803-91-7   |
| 77 | 8-((1R,2S)-2-(2-carboxyethyl)-5-oxocyclopent-3-en-1-yl)-6-oxooctanoic acid            | Tetranor-PGJM        | 1352751-83-7 |
| 78 | Resolvin D1                                                                           | Resolvin D1          | 872993-05-0  |
| 79 | Resolvin D2                                                                           | Resolvin D2          | 810668-37-2  |
| 80 | Resolvin D3                                                                           | Resolvin D3          | 916888-47-6  |
| 25 | Thromboxane B2-d4                                                                     | TXB2-d4              | 1346112-79-5 |
| 26 | Prostaglandin E2-d4                                                                   | PGE2-d4              | 34210-10-1   |
| 27 | Arachidonic acid-d8                                                                   | AA-d8                | 69254-37-1   |
| 46 | 15-hydroxyeicosatetraenoic acid-d8                                                    | 15-HETE-d8           | 84807-87-4   |
| 47 | Leukotriene B4-d4                                                                     | LTB4-d4              | 124629-74-9  |
| 81 | Resolvin D1-d5                                                                        | Resolvin D1-d5       | 1881277-32-2 |

Supplementary Figure S1. Representative individual MRM ion-chromatograms of all eicosanoid standards at 50 ng/ml in surrogate matrix under final chromatography and detection conditions. Target compound is noted by asterisk (\*).

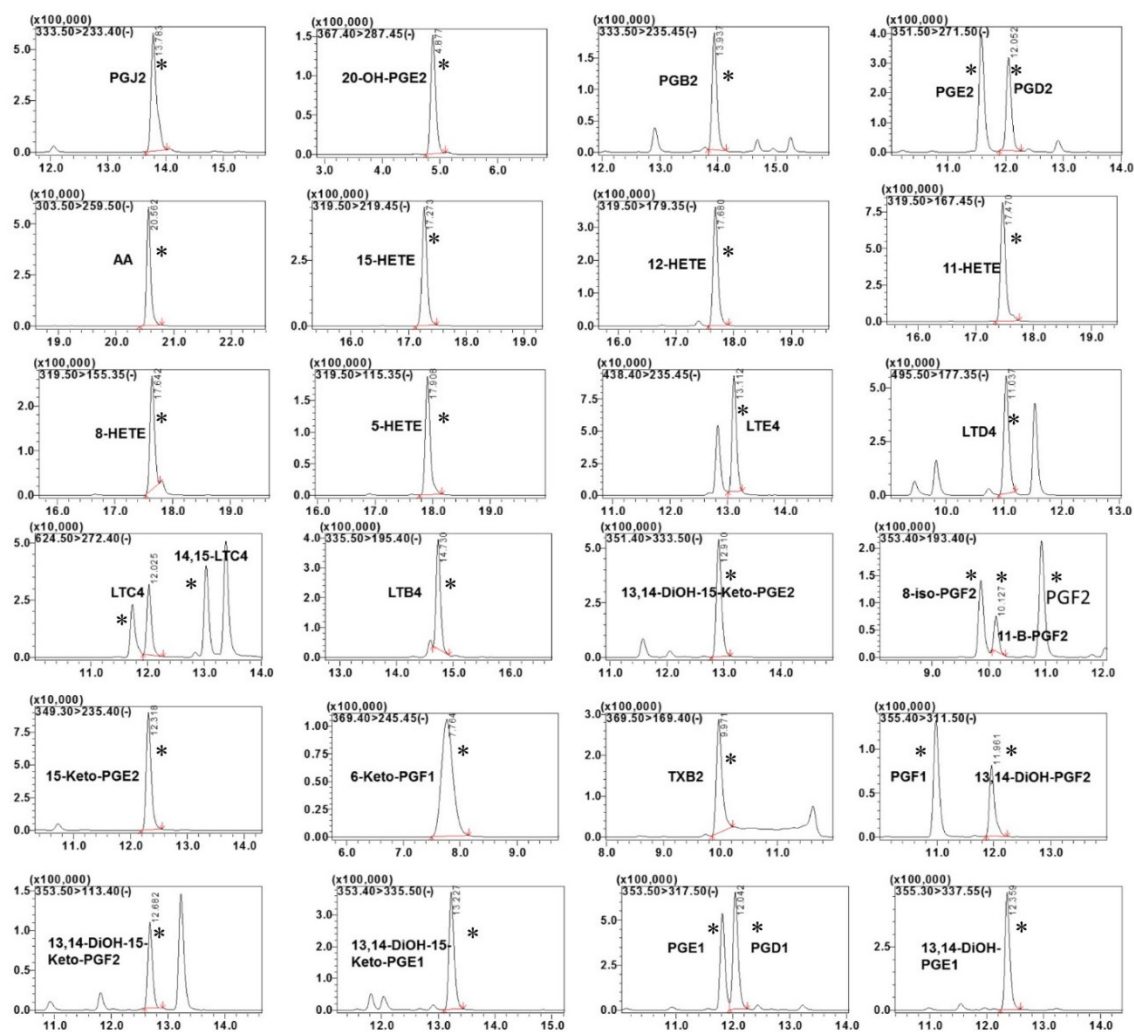



Figure S1. Continued....

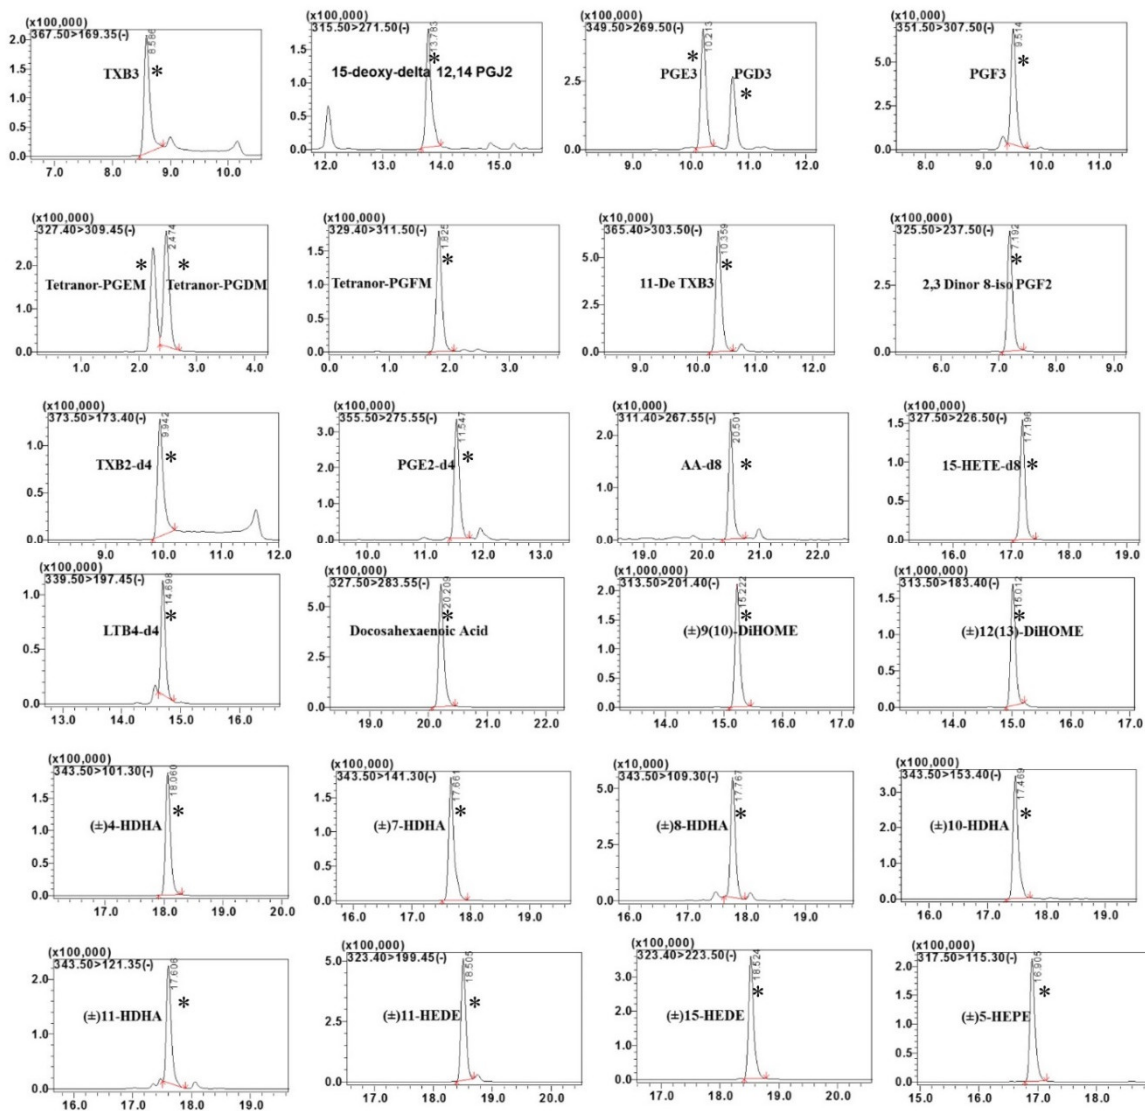

Figure S1. Continued....

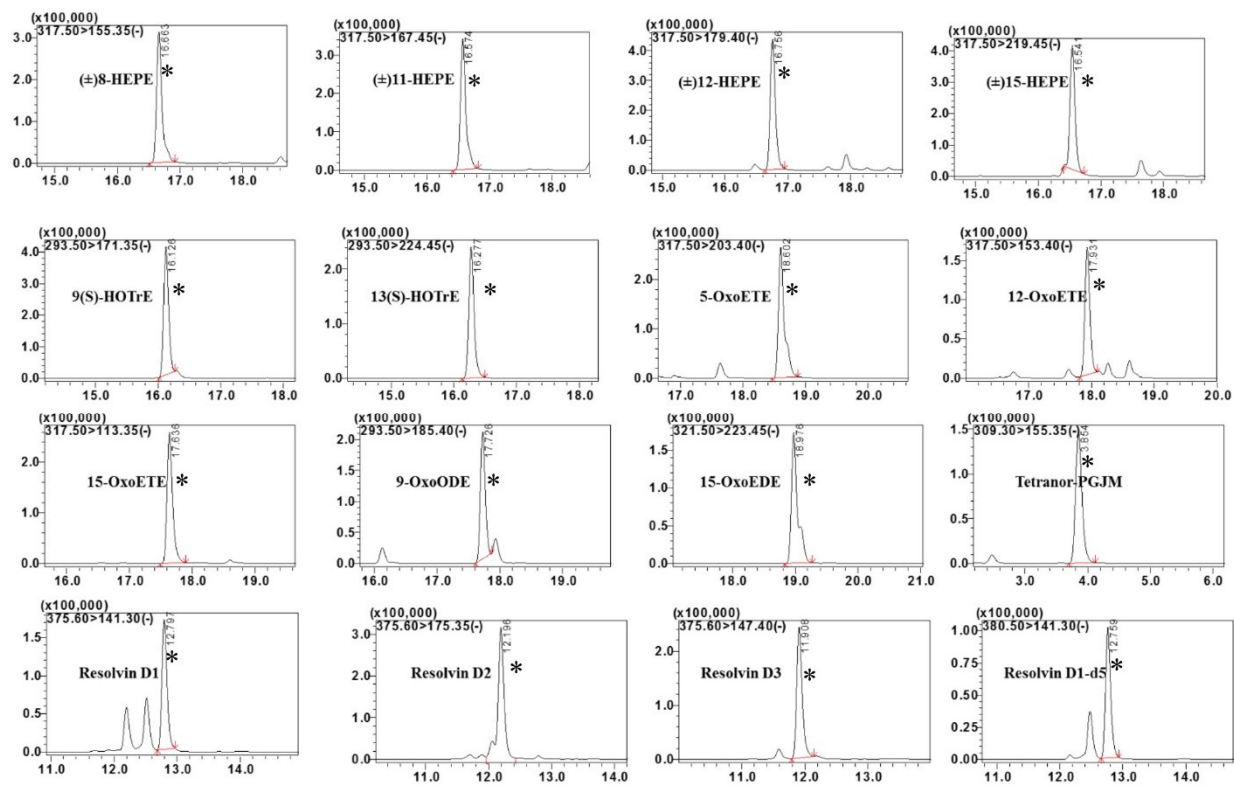

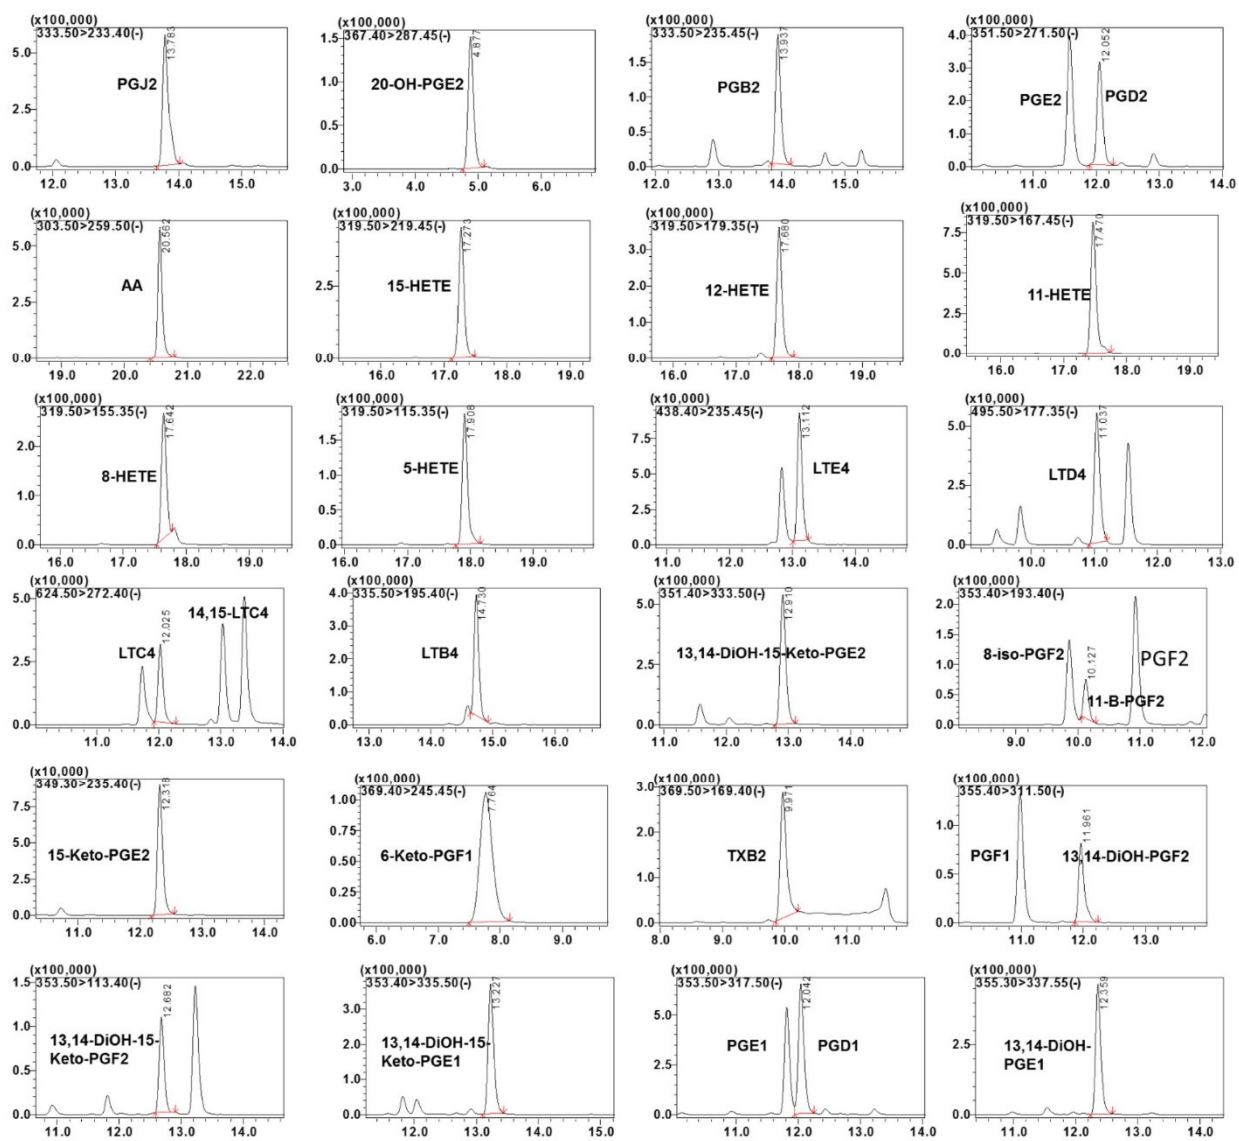

Figure S1. (Continued...)

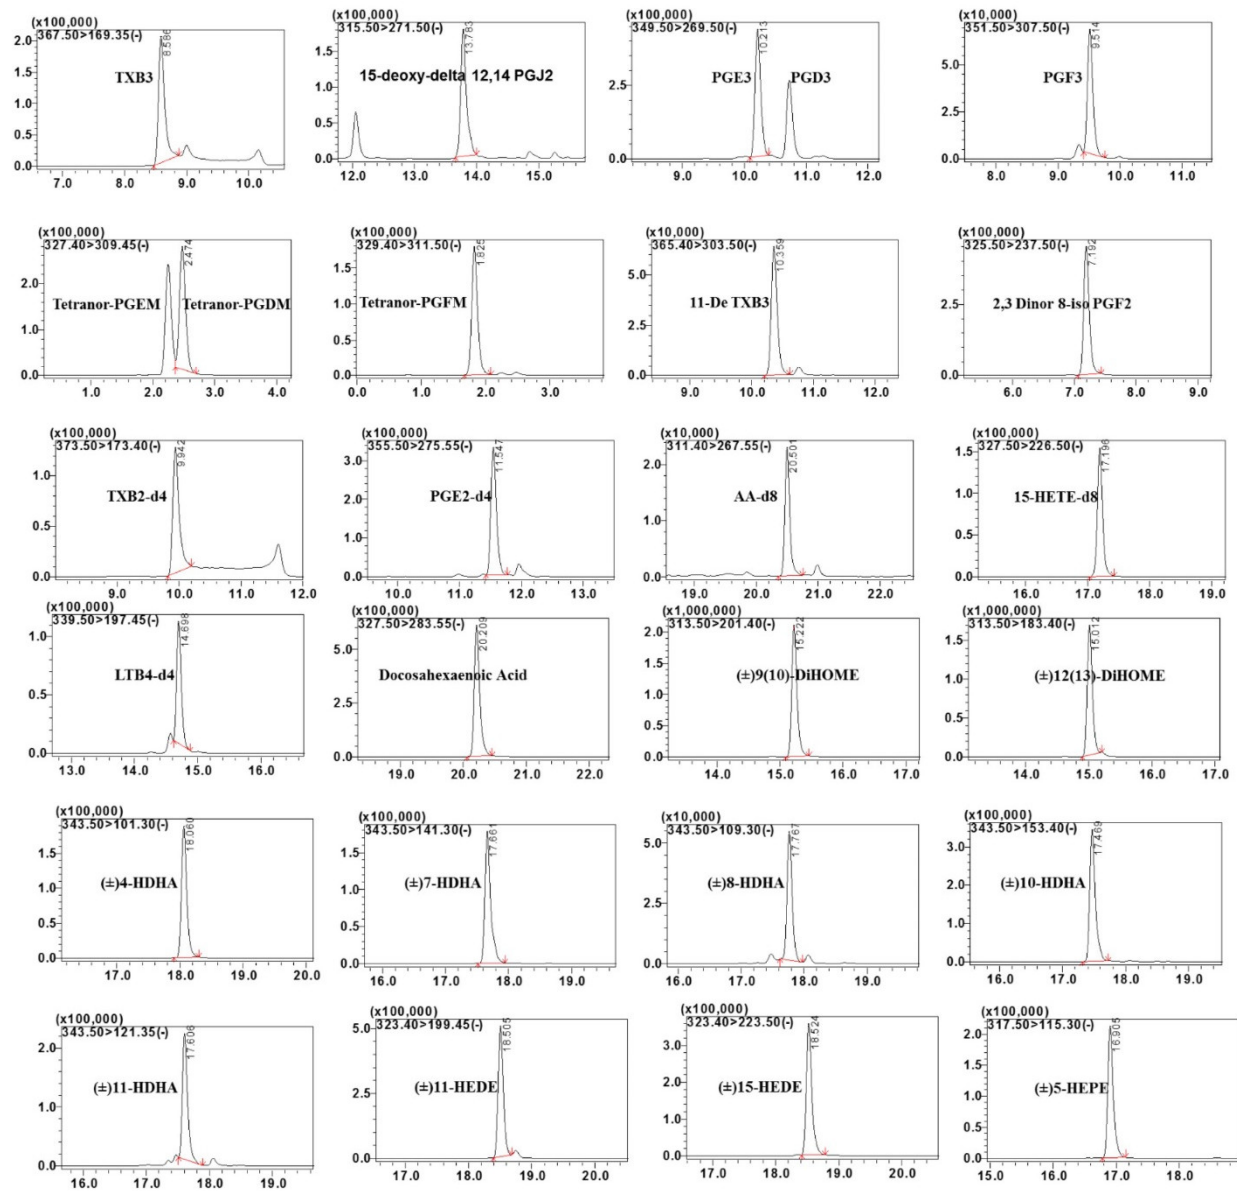

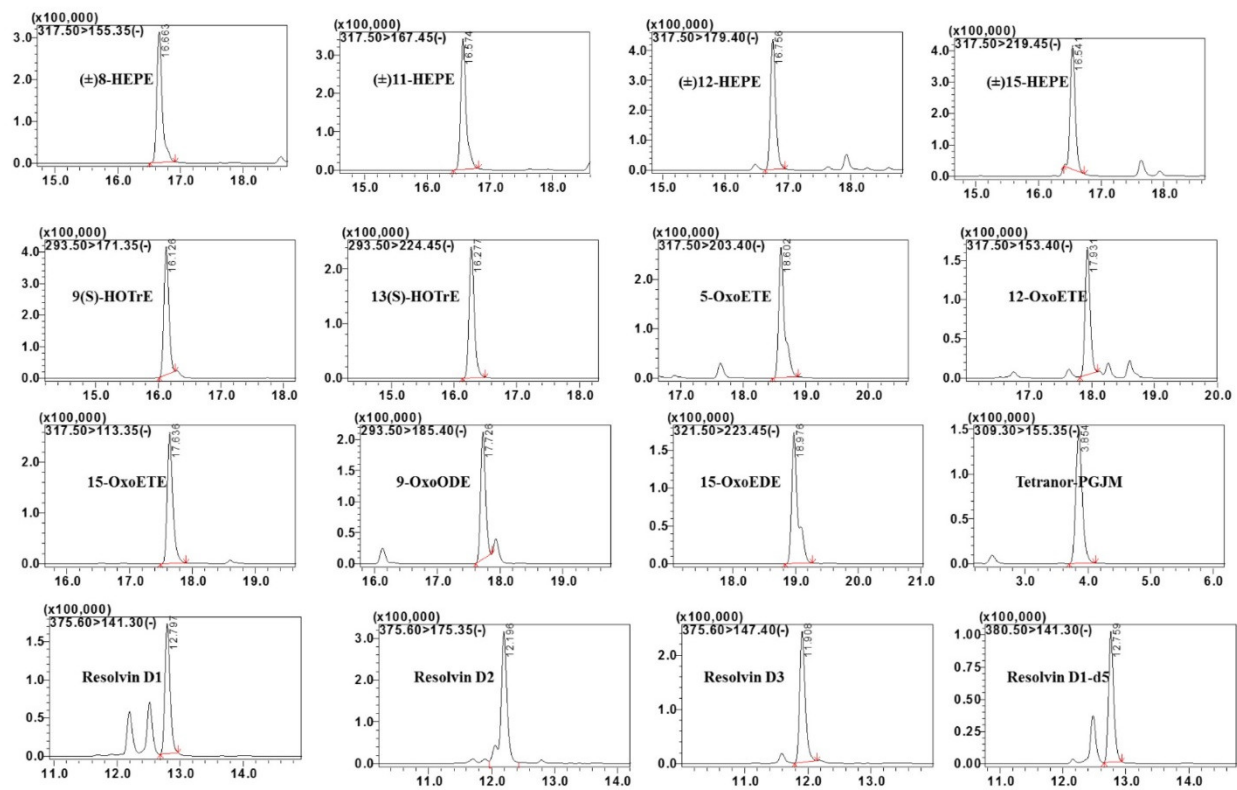

## References

1. Blewett, A. J.; Varma, D.; Gilles, T.; Libonati, J. R.; Jansen, S. A., Development and validation of a high-performance liquid chromatography-electrospray mass spectrometry method for the simultaneous determination of 23 eicosanoids. *J Pharm Biomed Anal* **2008**, 46, (4), 653-62.
2. Yamada, M.; Kita, Y.; Kohira, T.; Yoshida, K.; Hamano, F.; Tokuoka, S. M.; Shimizu, T., A comprehensive quantification method for eicosanoids and related compounds by using liquid chromatography/mass spectrometry with high speed continuous ionization polarity switching. *Journal of Chromatography B* **2015**, 995–996, 74-84.
3. Wong, A.; Sagar, D. R.; Ortori, C. A.; Kendall, D. A.; Chapman, V.; Barrett, D. A., Simultaneous tissue profiling of eicosanoid and endocannabinoid lipid families in a rat model of osteoarthritis. *Journal of lipid research* **2014**, 55, (9), 1902-1913.
4. Shaik, J. S. B.; Miller, T. M.; Graham, S. H.; Manole, M. D.; Poloyac, S. M., Rapid and simultaneous quantitation of prostanoids by UPLC–MS/MS in rat brain. *Journal of Chromatography B* **2014**, 945, 207-216.
5. Le Faouder, P.; Baillif, V.; Spreadbury, I.; Motta, J.-P.; Rousset, P.; Chêne, G.; Guigné, C.; Tercé, F.; Vanner, S.; Vergnolle, N., LC–MS/MS method for rapid and concomitant quantification of pro-inflammatory and pro-resolving polyunsaturated fatty acid metabolites. *Journal of Chromatography B* **2013**, 932, 123-133.
6. Schoeman, J. C.; Harms, A. C.; van Weeghel, M.; Berger, R.; Vreeken, R. J.; Hankemeier, T., Development and application of a UHPLC–MS/MS metabolomics based comprehensive systemic and tissue-specific screening method for inflammatory, oxidative and nitrosative stress. *Analytical and bioanalytical chemistry* **2018**, 410, (10), 2551-2568.
7. Yue, H.; Jansen, S. A.; Strauss, K. I.; Borenstein, M. R.; Barbe, M. F.; Rossi, L. J.; Murphy, E., A liquid chromatography/mass spectrometric method for simultaneous analysis of arachidonic acid and its endogenous eicosanoid metabolites prostaglandins, dihydroxyeicosatrienoic acids, hydroxyeicosatetraenoic acids, and epoxyeicosatrienoic acids in rat brain tissue. *Journal of pharmaceutical and biomedical analysis* **2007**, 43, (3), 1122-34.
8. Jouvène, C.; Fourmaux, B.; Geloën, A.; Balas, L.; Durand, T.; Lagarde, M.; Letisse, M.; Guichardant, M., Ultra-Performance Liquid Chromatography–Mass Spectrometry Analysis of Free and Esterified Oxygenated Derivatives from Docosahexaenoic Acid in Rat Brain. *Lipids* **2018**, 53, (1), 103-116.
